# Supplementary material for: SARS-CoV-2 Spike Protein Suppresses ACE2 and Type I Interferon Expression in Primary Cells From Macaque Lung Bronchoalveolar Lavage
Source: PubMed Central journal article supplement (PMC8213020; doi:10.3389/fimmu.2021.658428), 2021-06-04
Supplement: DataSheet_1.pdf [file DataSheet_1.pdf]

# Supplementary Figure 1. Characteristic analysis of cell types in lung bronchoalveolar lavage from naïve healthy macaques

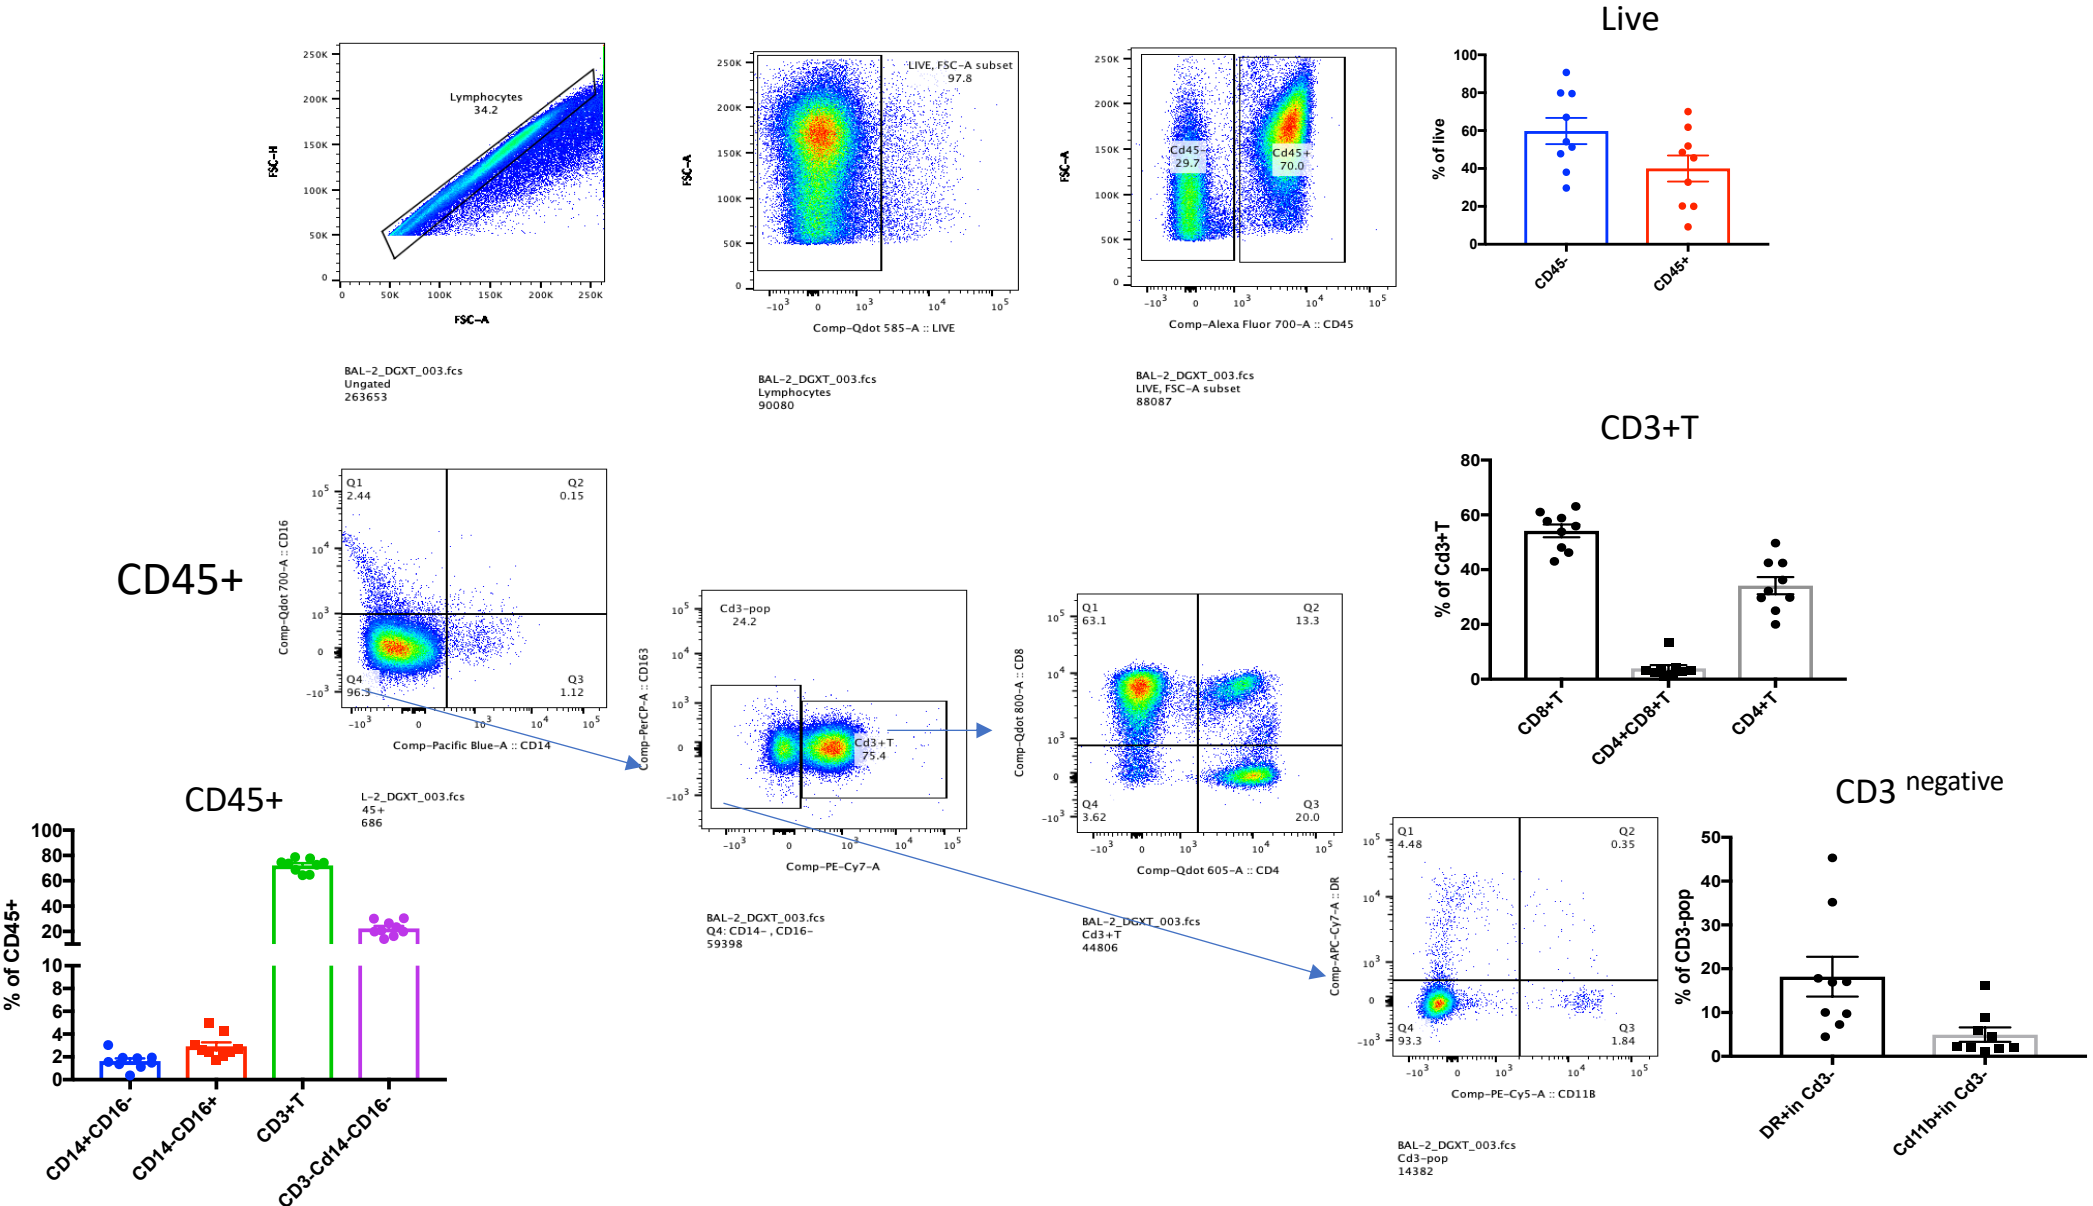

Supplementary Figure 2. SARS-CoV-2 spike protein treatment did not change the expression levels of most chemokines/cytokines secreted in lung bronchoalveolar lavage fluids at the protein level, except for RANTES/CCL5.

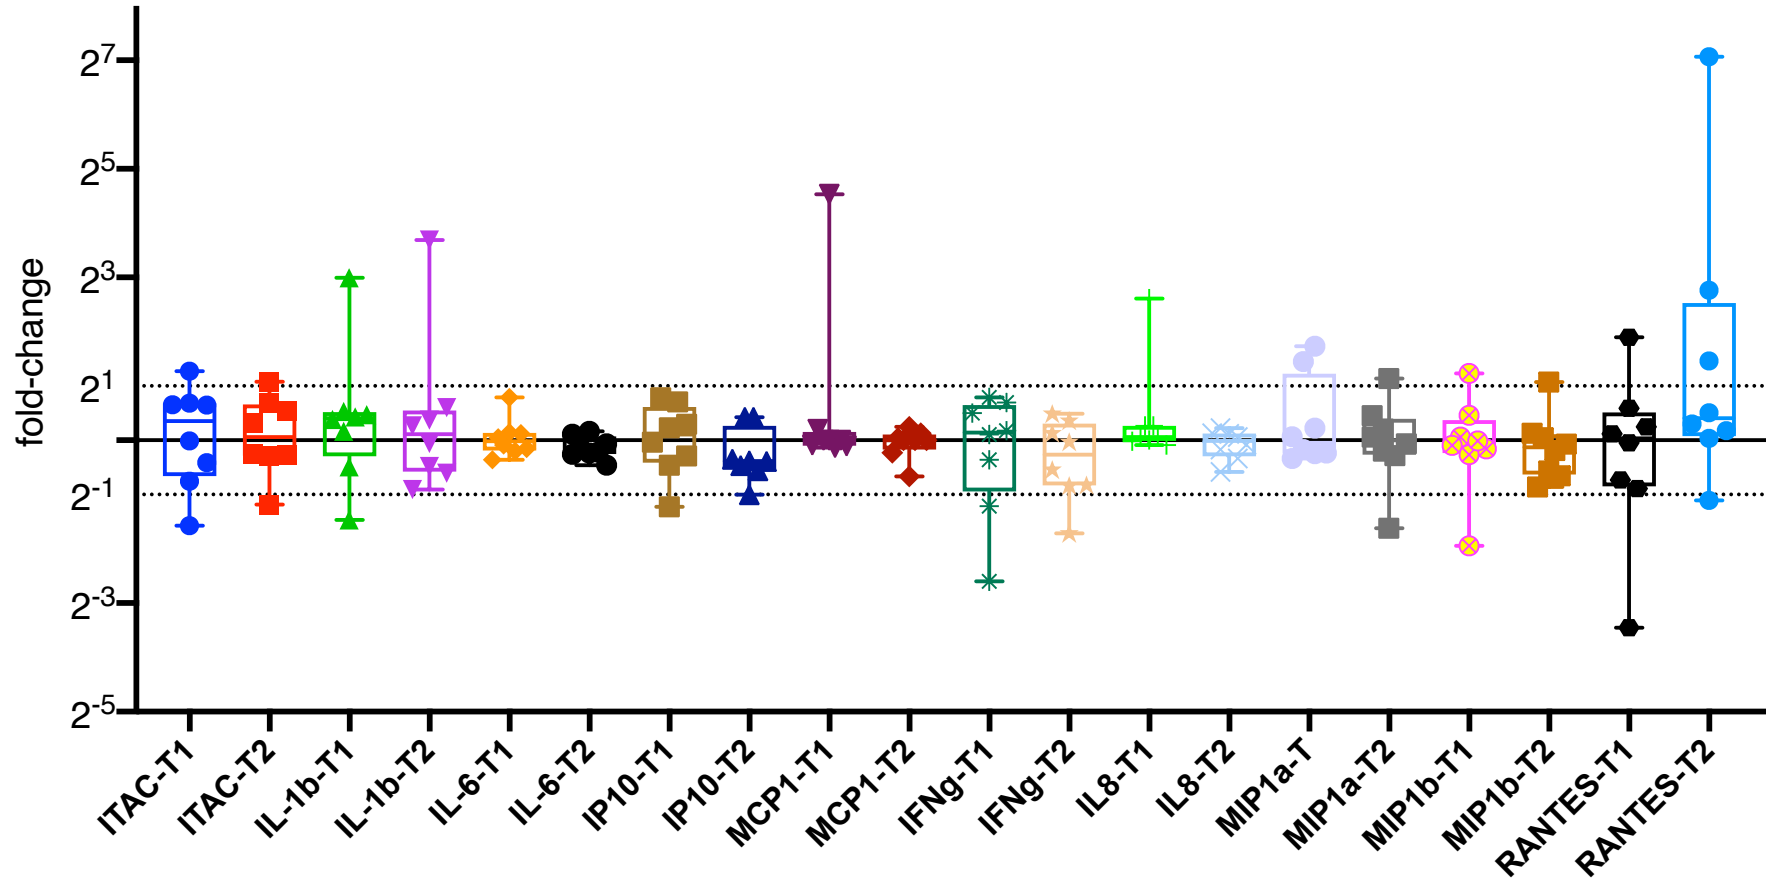

**Supplementary Figure 3. SARS-CoV-2 spike protein suppressed the mRNA expression of type I interferon in lung bronchoalveolar lavage from naïve macaques.** Primary lung bronchoalveolar lavages from naïve rhesus macaques were cultured with 1 (T1) or 2 (T2)  $\mu\text{g/ml}$  of spike protein S1 for 20 hrs (n=20 and n=6, respectively). After the supernatants were collected, the cells were lysed with trizol and RNAs were isolated. After reverse transcription, macaque-specific primer/probe sets were used to measure the mRNA expression levels of ACE2, interferon 1, 2, 6, 8, 14 and 1,

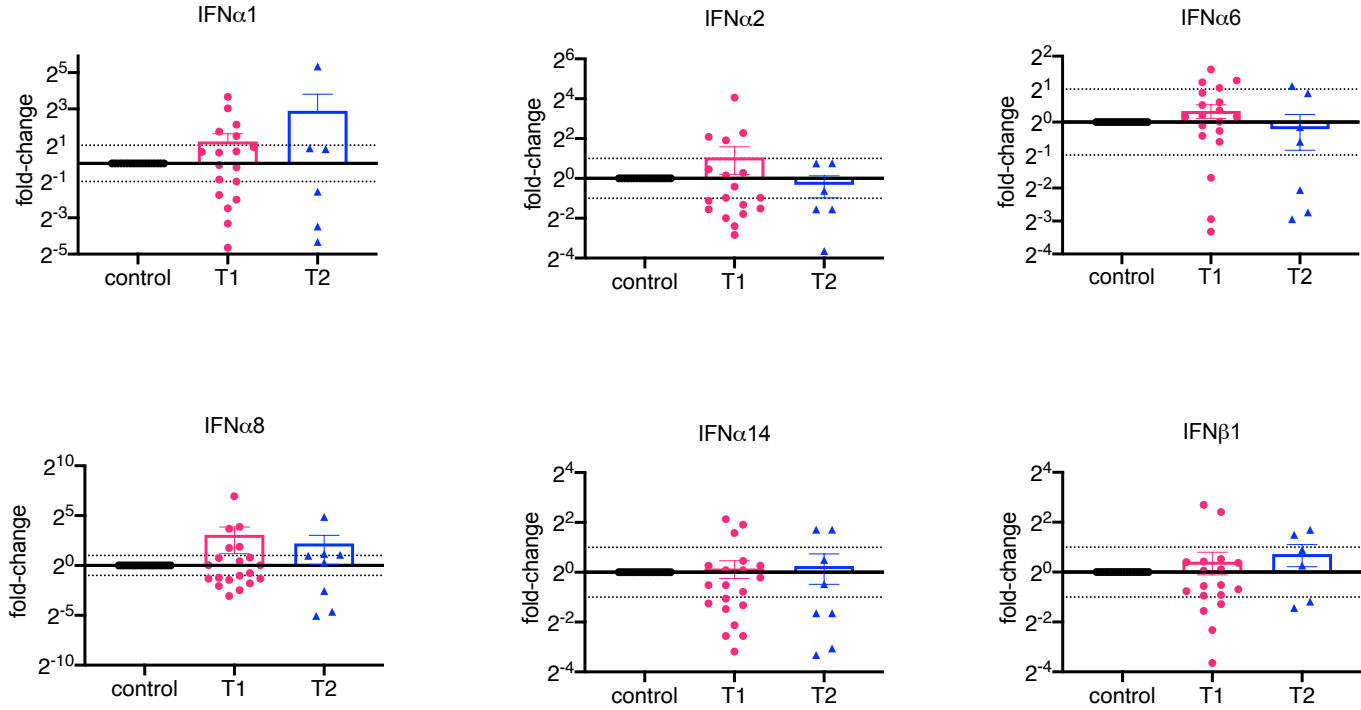

## Supplementary Figure 4. ACE2 expression levels positively correlated with some subsets of type I interferons in lung bronchoalveolar lavage

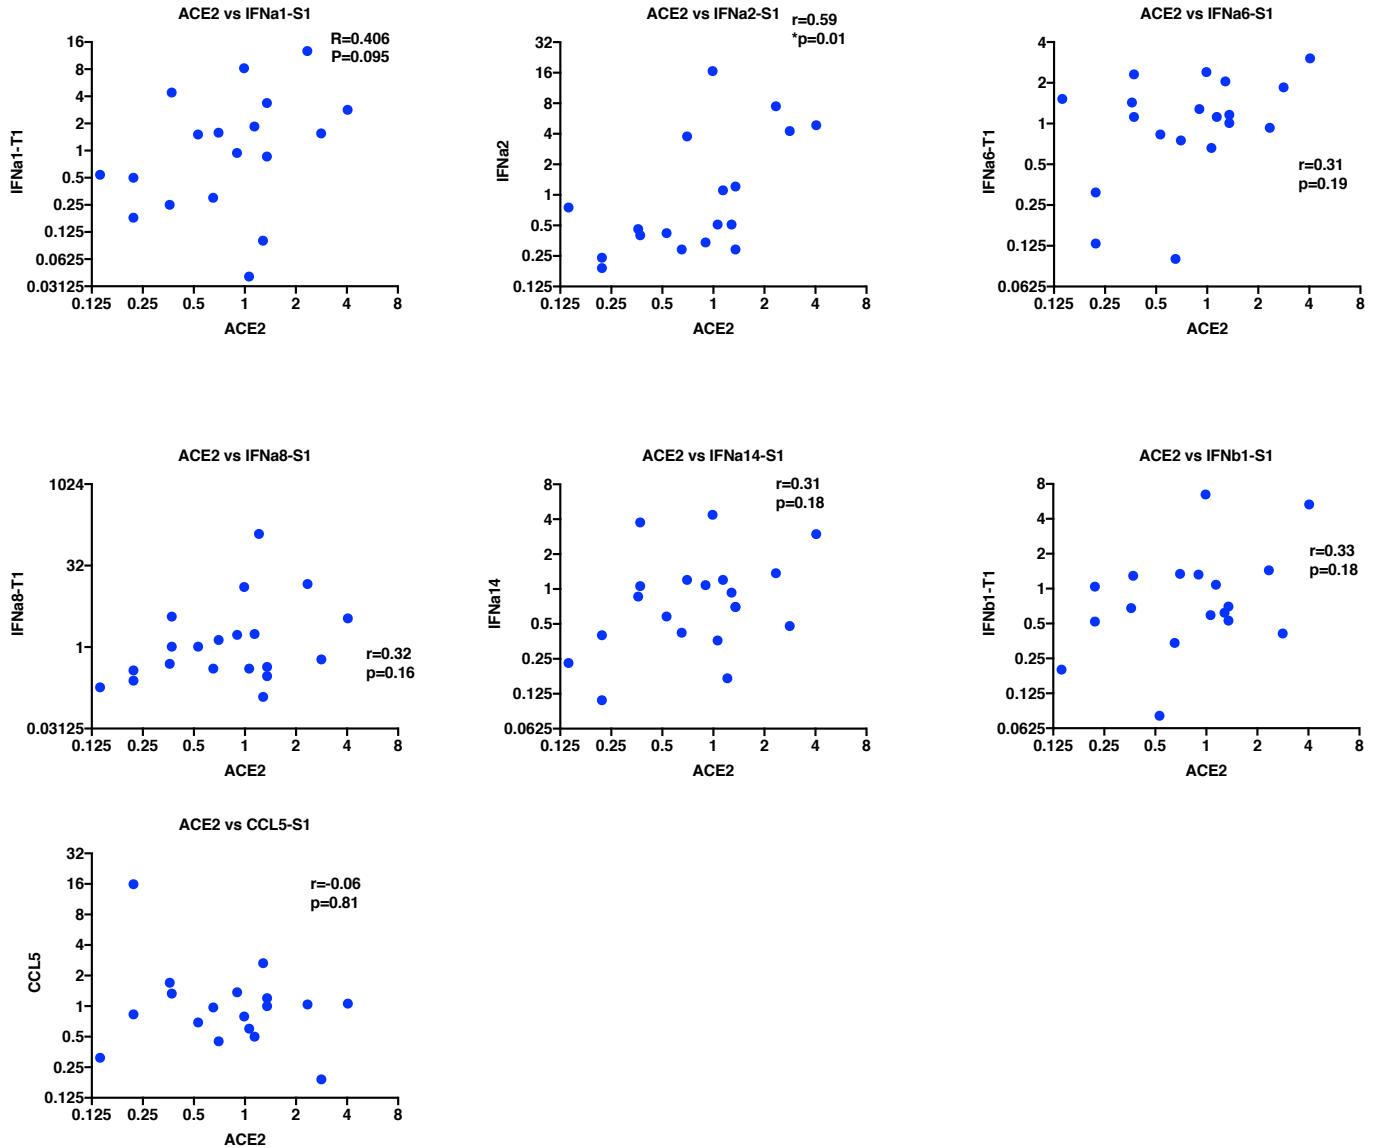

**Supplementary Figure 5. SARS-CoV-2 spike protein reduced poly I:C-induced the mRNA expression of type I interferon in lung bronchoalveolar lavage from naïve macaques.** Primary lung bronchoalveolar lavage fluids from 16 naïve rhesus macaques were cultured with 1 mg of poly I:C with or without 1  $\mu$ g/ml of spike protein S1 for 20 hrs. RNAs were isolated with Trizol and followed by reverse transcription. Macaque-specific primer/probe sets for interferon  $\alpha$ 1, 2, 6, 8, 14 and 1 were used. Data are shown in mean $\pm$ SEM.

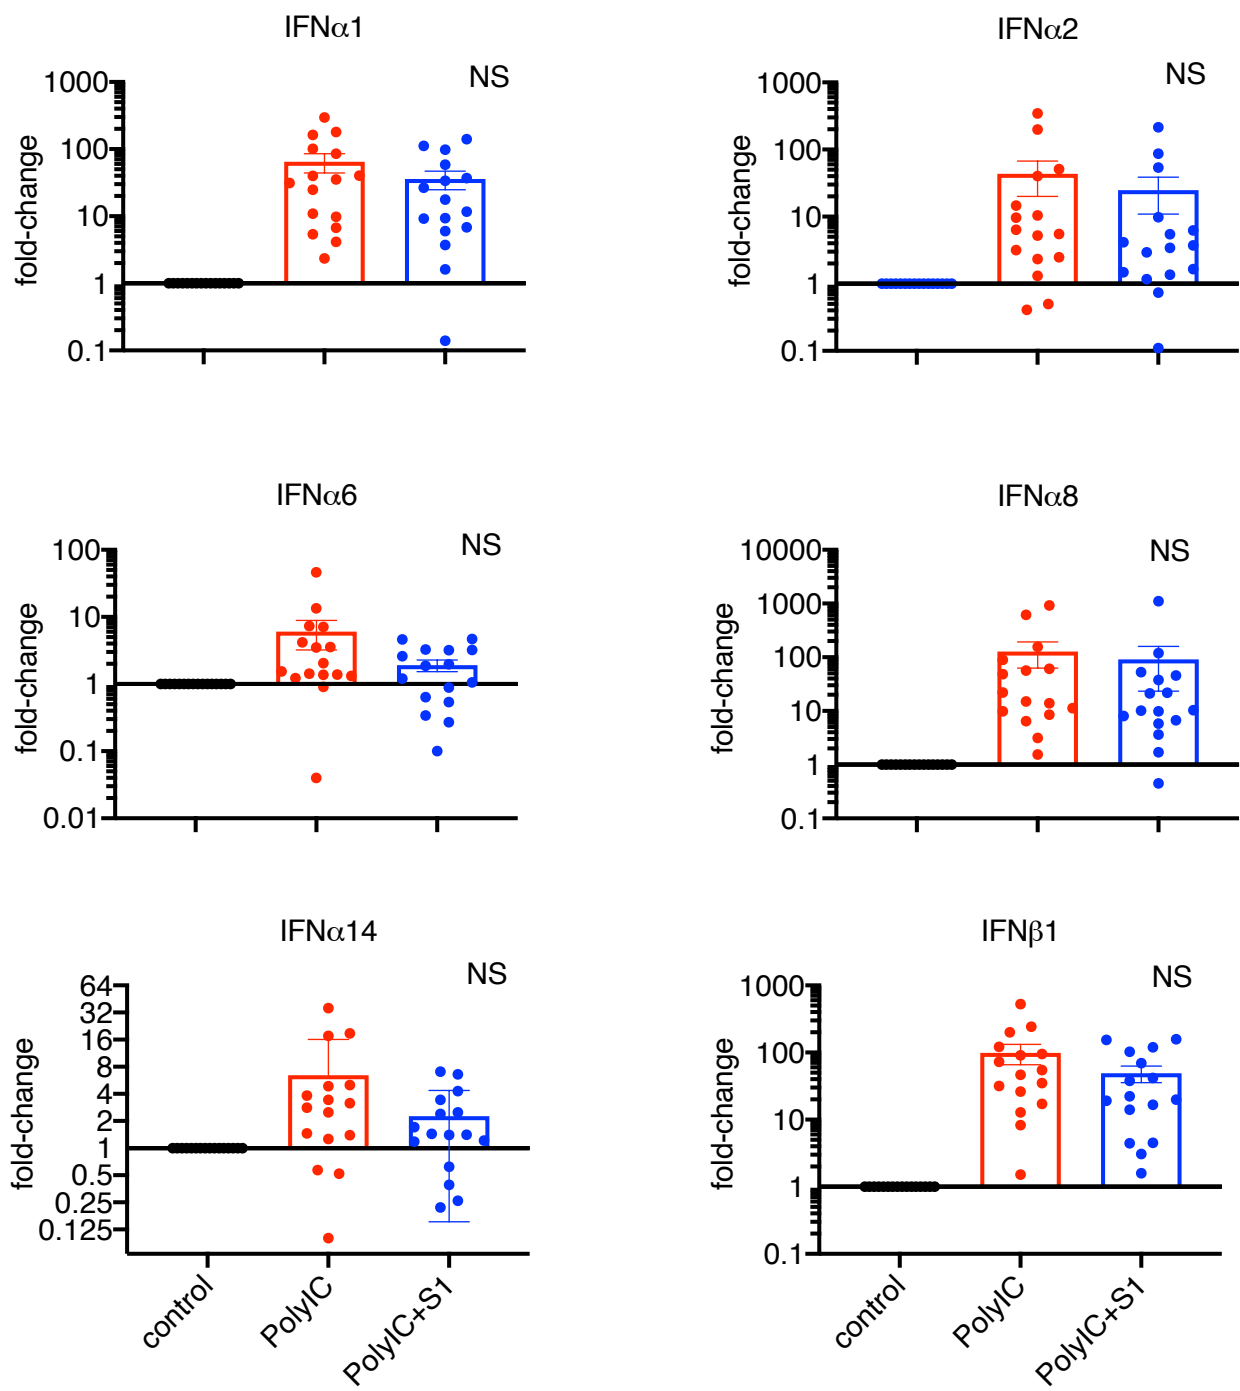

Supplementary Table 1. the correlations between expression levels of ACE2 and type I interferons in the presence of poly I:C only

| <b>Poly I: C only</b>   | <b>ACE2 vs. IFNa1</b> | <b>ACE2 vs. IFNa2</b> | <b>ACE2 vs. IFNa4</b> | <b>ACE2 vs. IFNa6</b> | <b>ACE2 vs. IFNa8</b> | <b>ACE2 vs. IFNa14</b> | <b>ACE2 vs. IFNb1</b> |
|-------------------------|-----------------------|-----------------------|-----------------------|-----------------------|-----------------------|------------------------|-----------------------|
| Spearman r              | 0.14                  | 0.01                  | 0.25                  | 0.54                  | 0.14                  | 0.22                   | -0.14                 |
| 95% confidence interval | -0.40 to 0.60         | -0.49 to 0.52         | -0.29 to 0.67         | -0.049 to 0.82        | -0.40 to 0.60         | -0.32 to 0.65          | -0.60 to 0.39         |
| P value (two-tailed)    | 0.61                  | 0.96                  | 0.35                  | *0.037                | 0.62                  | 0.41                   | 0.61                  |

Supplementary Table 2. the correlations between expression levels of ACE2 and type I interferons in the presence of poly I:C and spike protein S1

| <b>Poly I: C &amp; S1</b> | <b>ACE2 vs. IFNa1</b> | <b>ACE2 vs. IFNa2</b> | <b>ACE2 vs. IFNa4</b> | <b>ACE2 vs. IFNa6</b> | <b>ACE2 vs. IFNa8</b> | <b>ACE2 vs. IFNa14</b> | <b>ACE2 vs. IFNb1</b> |
|---------------------------|-----------------------|-----------------------|-----------------------|-----------------------|-----------------------|------------------------|-----------------------|
| Spearman r                | 0.54                  | -0.04                 | 0.58                  | 0.63                  | 0.31                  | 0.54                   | 0.17                  |
| 95% confidence interval   | -0.04 to 0.82         | -0.54 to 0.48         | 0.10 to 0.84          | -0.18 to 0.86         | -0.23 to 0.71         | 0.04 to 0.82           | -0.37 to 0.62         |
| P value (two-tailed)      | *0.035                | 0.88                  | *0.02                 | *0.01                 | 0.23                  | *0.035                 | 0.53                  |
